# Supplementary material for: Molecular characterization of organic aerosols in urban and forested areas of Paris using high resolution mass spectrometry
Source: Copernicus journal article supplement (doi:10.5194/egusphere-2024-3015), 2024-10-15
Supplement: Supplementary file 1 [file egusphere-2024-3015-supplement.pdf]

# Molecular characterization of organic aerosols in urban and forested areas of Paris using high resolution mass spectrometry

5 Diana L. Pereira<sup>1</sup>, Chiara Giorio<sup>2</sup>, Aline Gratien<sup>1</sup>, Alexander Zherebker<sup>2</sup>, Gael Noyalet<sup>1</sup>, Servanne Chevaillier<sup>3</sup>, Stéphanie Alage<sup>3</sup>, Elie Almarj<sup>1</sup>, Antonin Bergé<sup>1,a</sup>, Thomas Bertin<sup>3</sup>, Mathieu Cazaunau<sup>3</sup>,  
10 Patrice Coll<sup>1</sup>, Ludovico Di Antonio<sup>3</sup>, Sergio Harb<sup>3,7</sup>, Johannes Heuser<sup>3</sup>, Cécile Gaimoz<sup>3</sup>, Oscar Guillemant<sup>3,4</sup>, Brigitte Language<sup>3,b</sup>, Olivier Lauret<sup>3</sup>, Camilo Macias<sup>1</sup>, Franck Maisonneuve<sup>3</sup>, Bénédicte Picquet-Varrault<sup>3</sup>, Raquel Torres<sup>3,c</sup>, Sylvain Triquet<sup>1</sup>, Pascal Zapf<sup>3</sup>, Lelia Hawkins<sup>5</sup>, Drew Pronovost<sup>5</sup>, Sydney Riley<sup>5</sup>, Pierre-Marie Flaud<sup>6</sup>, Emilie Perraudin<sup>6</sup>, Pauline Pouyes<sup>6</sup>, Eric Villenave<sup>6</sup>, Alexandre Albinet<sup>7</sup>, Olivier Favez<sup>7</sup>, Robin Aujay-Plouzeau<sup>7</sup>, Vincent Michoud<sup>1</sup>, Christopher Cantrell<sup>3</sup>, Manuela Cirtog<sup>3</sup>, Claudia Di Biagio<sup>1</sup>, Jean-François Doussin<sup>3</sup> and Paola Formenti<sup>1</sup>

<sup>1</sup>Université Paris Cité and Univ Paris Est Creteil, CNRS, LISA, Paris, F-75013, France

<sup>2</sup>Yusuf Hamied Department of Chemistry, University of Cambridge, Cambridge, CB2 1EW, United Kingdom

15 <sup>3</sup>Université Paris Est Creteil and Université Paris Cité, CNRS, LISA, Créteil, F-94010, France

<sup>4</sup>Université Paris-Saclay, Ecole Normale Supérieure Paris-Saclay, 4 avenue des sciences, 91190 Gif-sur-Yvette, France

<sup>5</sup>Department of Chemistry, Harvey Mudd College, 301 Platt Blvd, Claremont, California 91711, United States

<sup>6</sup>Univ. Bordeaux, CNRS, EPOC, EPHE, UMR 5805, F-33600 Pessac, France

<sup>7</sup>INERIS, Parc technologique Alata BP2, 60550 Verneuil en Halatte, France

20 <sup>a</sup>now at Laboratoire des Sciences du Climat et de l'Environnement, CEA-CNRS-UVSQ, IPSL, Université Paris–Saclay, 91191 Gif-sur-Yvette, France

<sup>b</sup>now at Unit for Environmental Sciences and Management, North-West University, Potchefstroom, South Africa

<sup>c</sup>now at Center for Research in Sustainable Chemistry-CIQSO, University of Huelva, Campus de El Carmen, E-21071, Huelva, Spain

25

## Supplementary material

Figures S1, S2, S3, S4 and S5, Table S1

## 30 Orbitrap data interpretation

Different regimes in the assignments of peaks obtained by means of high-resolution mass spectrometry (HRMS) analysis based on oxidation state information in terms of the O/C vs H/C ratios has been performed in order to further understand and assign their compound nature. Using the Van Krevelen diagrams for organic mixtures, regions of condensed hydrocarbons, lipids, secondary organic aerosol (SOA), proteins and carboxylic acids (Wozniak et al., 2008) or more generally as aliphatic, aromatic and SOA domains (Kourtchev et al., 2014) have been described. Considering these definitions, we assigned three domains with aliphatic compounds belonging to the less oxidized domain with  $O/C < 0.5$  and high  $H/C > 1.5$ , low oxygenated aromatic domain is present at  $O/C < 0.5$  and  $H/C > 0.5$ , and more oxidized compounds can be found at higher  $O/C > 0.5$ . Examples for the domains arise from the analysis of the filter from Paris and Rambouillet.  $C_{10}H_{16}O_3$  (possible pinonic acid) with  $O/C = 0.3$  and  $H/C = 1.6$  in the aliphatic domain, considered as a first oxidation product of  $\alpha$ -pinene (Kristensen et al., 2013).  $C_8H_6O_4$  with  $O/C = 0.5$  and  $H/C = 0.62$ , possible associated to alkylbenzenedioic acids from urban aerosols (Simoneit, 1985) or aromatics with carbonyl and hydroxyl functionalities with formula  $C_9H_6O_4$  (Rincón et al., 2012) with  $O/C = 0.44$  and  $H/C = 0.66$ , may falls in the aromatic domain.  $C_8H_{12}O_6$  (possible 3-methyl-1,2,3-butanetricarboxylic acid, MBTCA) with  $O/C = 0.75$  and  $H/C = 1.5$ , as a further oxidation product of cis-pinonic acid (Kourtchev et al., 2015), in the more oxidized domain.

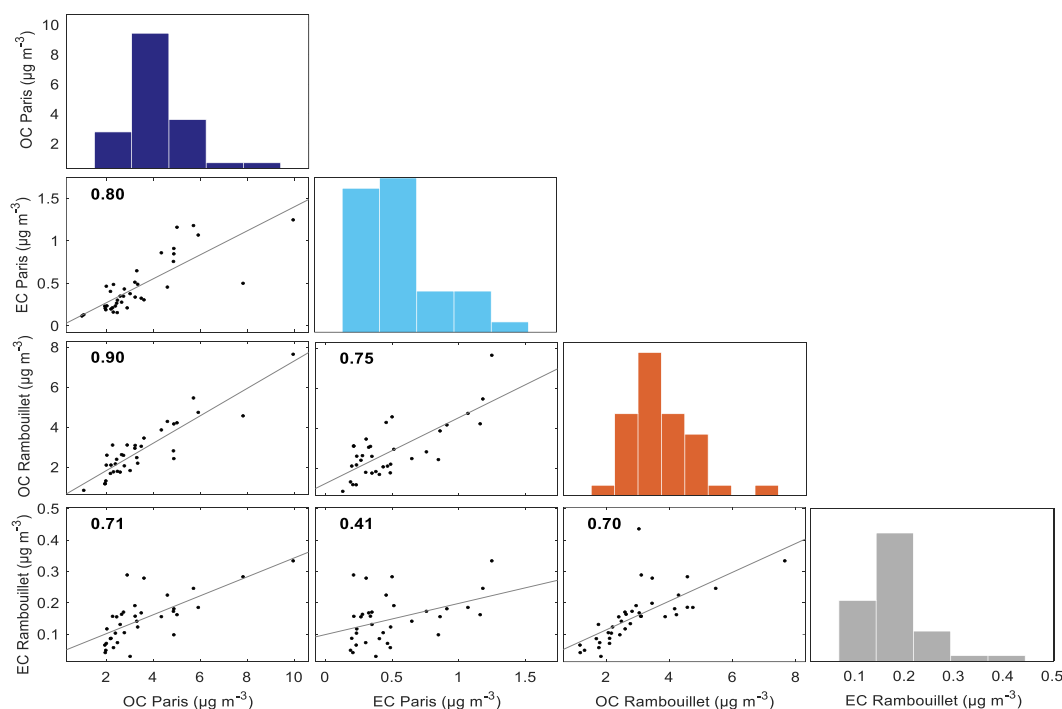

45

**Figure S1: Pearson correlations matrix for OC and EC concentrations for Paris (blue) and Rambouillet (orange and gray). Data from the overlap period (June 27 to July 22) is considered here and  $r$  is represented for each correlation. Normal distributions for the values of OC concentrations for Paris and Rambouillet and EC concentrations for Rambouillet are observed here.**

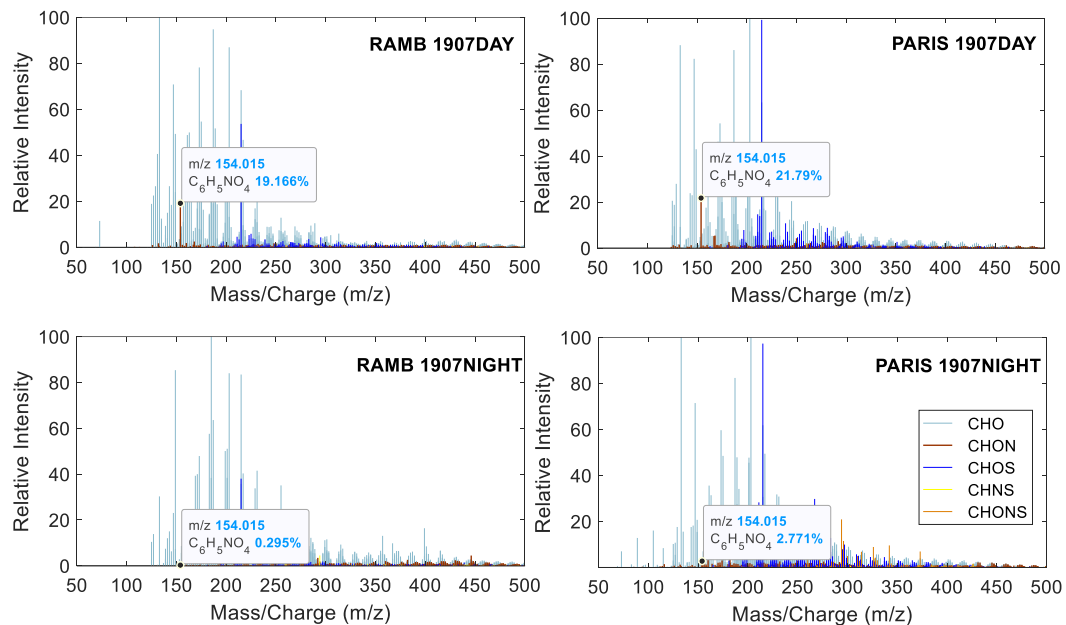

50 **Figure S2: Mass spectra from direct infusion in the negative mode nano-ESI analysis for specific consecutive samples of Rambouillet (RAMB) and Paris samples collected during the day and night periods of July 19 of the summer 2022. Identification of the presence of nitrocathecol as a BB molecular tracer. Molecular formulae are grouped as CHO (clear blue), CHON (brown), CHOS (dark blue), CHNS (yellow) and CHONS (orange) classes.**

55

**Table S1. Bulk characteristics and number of formulae detected for each sample of Paris and Rambouillet. Formulae are obtained by HRSM analysis for day and night periods. The values of T, RH, O<sub>3</sub> concentrations and NO<sub>x</sub> concentrations presented here represent average values for the period of sampling and are reported with their standard deviations.**

| sample name     | Number of formulae |      |      |      |       |      | Atmospheric conditions |             |                      |                       |                       |
|-----------------|--------------------|------|------|------|-------|------|------------------------|-------------|----------------------|-----------------------|-----------------------|
|                 | CHO                | CHON | CHOS | CHNS | CHONS | ALL  | T (°C)                 | RH (%)      | O <sub>3</sub> (ppb) | NO <sub>x</sub> (ppb) | SO <sub>2</sub> (ppb) |
| RAMB0307 DAY    | 650                | 433  | 379  | 5    | 177   | 1644 | 19.4 ± 3.9             | 56.1 ± 18.4 | 34.7 ± 8.4           | 0.9 ± 0.3             | 0.3 ± 0.1             |
| RAMB0307 NIGHT  | 752                | 706  | 382  | 23   | 236   | 2099 | 11.6 ± 2.8             | 81.9 ± 8.8  | 23.5 ± 9.7           | 1.1 ± 0.9             | 0.2 ± 0.1             |
| RAMB0407 DAY    | 1149               | 995  | 517  | 15   | 350   | 3026 | 19.8 ± 5.2             | 52.1 ± 21.1 | 38.0 ± 13.9          | 0.9 ± 0.4             | 0.4 ± 0.2             |
| RAMB0407 NIGHT  | 707                | 800  | 422  | 23   | 419   | 2371 | 12.5 ± 3.4             | 78.9 ± 11.5 | 29.8 ± 10.9          | 0.9 ± 0.2             | 0.4 ± 0.2             |
| RAMB1107 NIGHT  | 1225               | 1505 | 447  | 36   | 328   | 3541 | 19.4 ± 2.0             | 64.7 ± 10.0 | 34.6 ± 5.4           | 2.7 ± 1.3             | 0.3 ± 0.1             |
| RAMB1207 DAY    | 1519               | 2430 | 515  | 113  | 576   | 5153 | 26.3 ± 5.1             | 41.0 ± 22.3 | 61.6 ± 22.3          | 1.4 ± 0.6             | 0.4 ± 0.1             |
| RAMB1207 NIGHT  | 1385               | 1569 | 548  | 64   | 337   | 3903 | 18.8 ± 0.9             | 64.9 ± 3.7  | 34.4 ± 8.7           | 1.0 ± 0.7             | 0.2 ± 0.1             |
| RAMB1307 DAY    | 1529               | 2197 | 334  | 42   | 461   | 4563 | 29.0 ± 5.9             | 34.7 ± 17.7 | 58.3 ± 17.3          | 1.3 ± 0.9             | 0.9 ± 0.8             |
| RAMB1707 DAY    | 1215               | 1832 | 468  | 45   | 496   | 4056 | 25.2 ± 5.2             | 36.2 ± 17.5 | 69.1 ± 16.6          | 1.8 ± 0.8             | 0.4 ± 0.1             |
| RAMB1707 NIGHT  | 1547               | 1789 | 388  | 54   | 287   | 4065 | 18.1 ± 1.6             | 56.6 ± 4.8  | 46.1 ± 5.8           | 2.1 ± 0.9             | 0.3 ± 0.1             |
| RAMB1807 DAY    | 1571               | 1901 | 396  | 20   | 322   | 4210 | 30.6 ± 6.6             | 28.2 ± 14.7 | 77.3 ± 17.9          | 1.5 ± 0.6             | 1.0 ± 0.8             |
| RAMB1807 NIGHT  | 1516               | 1309 | 368  | 11   | 211   | 3415 | 23.7 ± 1.8             | 40.9 ± 4.4  | 54.2 ± 6.9           | 2.3 ± 0.9             | 0.4 ± 0.3             |
| RAMB1907 DAY    | 1679               | 1542 | 384  | 20   | 282   | 3907 | 31.6 ± 5.6             | 33.1 ± 13.5 | 75.0 ± 14.0          | 1.4 ± 0.6             | 1.5 ± 1.2             |
| RAMB1907 NIGHT  | 1361               | 1564 | 222  | 7    | 178   | 3332 | 21.6 ± 2.7             | 69.0 ± 13.4 | 44.1 ± 13.0          | 1.1 ± 0.4             | 0.4 ± 0.2             |
| PARIS0307 DAY   | 1415               | 2042 | 534  | 110  | 800   | 4901 | 20.7 ± 2.6             | 50.6 ± 10.1 | 36.0 ± 4.0           | 3.4 ± 1.4             | 0.1 ± 0.1             |
| PARIS0307 NIGHT | 970                | 1241 | 343  | 41   | 322   | 2917 | 17.4 ± 1.5             | 61.4 ± 5.0  | 29.5 ± 2.6           | 3.3 ± 1.3             | 0.2 ± 0.2             |
| PARIS0407 DAY   | 1375               | 2391 | 485  | 115  | 767   | 5133 | 21.9 ± 3.3             | 45.5 ± 11.9 | 38.7 ± 11.1          | 8.0 ± 3.9             | 0.2 ± 0.2             |
| PARIS0407 NIGHT | 1060               | 1485 | 410  | 76   | 450   | 3481 | 16.8 ± 2.0             | 68.1 ± 7.1  | 29.6 ± 2.7           | 3.2 ± 1.2             | 0.2 ± 0.3             |
| PARIS1107 NIGHT | 1038               | 1818 | 355  | 47   | 488   | 3746 | 21.4 ± 0.0             | 62.9 ± 0.1  | -                    | -                     | -                     |
| PARIS1207 DAY   | 807                | 1271 | 293  | 42   | 292   | 2705 | 28.2 ± 4.0             | 37.8 ± 14.7 | 49.6 ± 16.7          | 24.5 ± 17.0           | 0.1 ± 0.3             |
| PARIS1207 NIGHT | 984                | 1659 | 257  | 28   | 215   | 3143 | 26.1 ± 1.9             | 35.4 ± 6.9  | 25.7 ± 13.4          | 22.9 ± 10.8           | 0.3 ± 0.3             |
| PARIS1307 DAY   | 1021               | 1699 | 286  | 20   | 177   | 3203 | 31.1 ± 4.1             | 30.9 ± 9.1  | 45.5 ± 23.5          | 25.2 ± 27.4           | 0.3 ± 0.2             |
| PARIS1707 DAY   | 1119               | 1449 | 517  | 61   | 456   | 3602 | 26.7 ± 4.2             | 32.2 ± 10.3 | 47.3 ± 9.2           | 6.9 ± 4.0             | 0.6 ± 0.4             |
| PARIS1707 NIGHT | 1396               | 2161 | 533  | 84   | 609   | 4783 | 25.1 ± 1.7             | 33.2 ± 3.6  | 27.9 ± 4.8           | 20.4 ± 5.6            | 0.7 ± 0.7             |
| PARIS1807 DAY   | 1268               | 1509 | 290  | 31   | 181   | 3279 | 32.1 ± 5.1             | 24.8 ± 8.0  | 45.1 ± 20.3          | 24.7 ± 14.7           | 0.7 ± 0.9             |
| PARIS1807 NIGHT | 1481               | 2347 | 419  | 67   | 435   | 4749 | 28.4 ± 1.9             | 31.8 ± 3.4  | 25.0 ± 6.9           | 25.1 ± 8.6            | 0.4 ± 0.3             |
| PARIS1907 DAY   | 1222               | 1108 | 330  | 7    | 133   | 2800 | 34.0 ± 4.4             | 28.0 ± 10.2 | 51.9 ± 15.5          | 20.1 ± 12.3           | 0.8 ± 0.8             |
| PARIS1907 NIGHT | 1068               | 1157 | 516  | 54   | 438   | 3233 | 25.1 ± 2.1             | 62.2 ± 12.4 | 43.7 ± 5.9           | 4.1 ± 1.4             | 0.1 ± 0.1             |

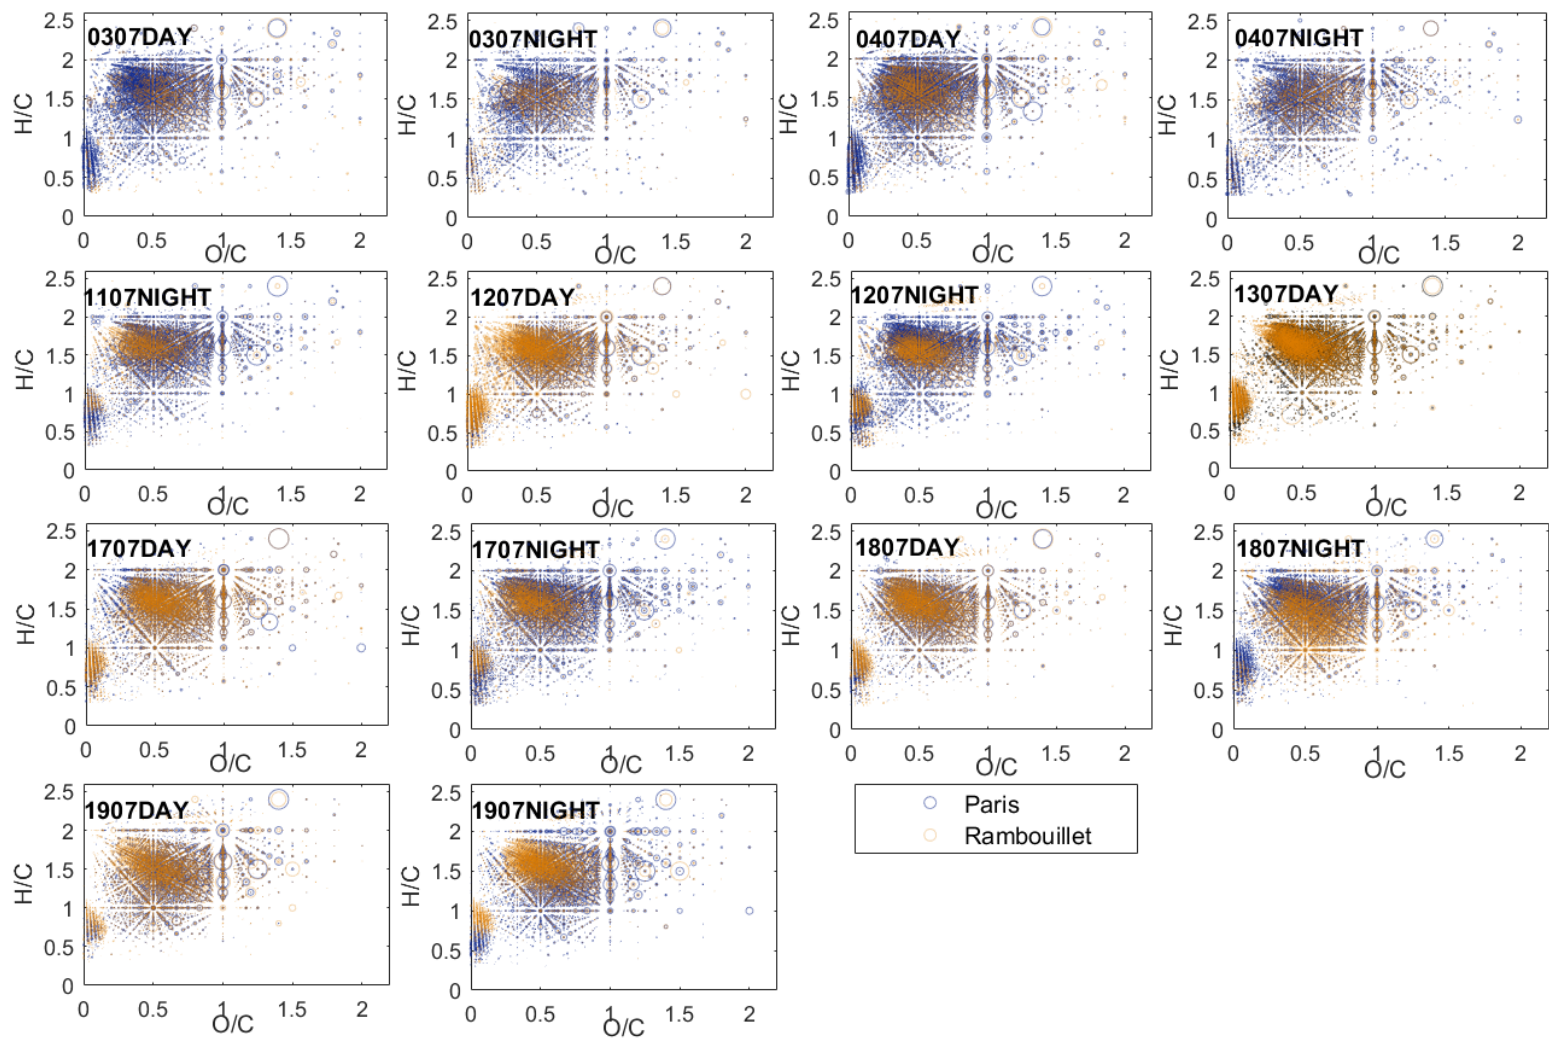

**Figure S3: Comparison of Van Krevelen diagrams of specific samples for compounds detected in the aerosol samples collected at Rambouillet (orange) and Paris (blue) in the summer 2022. Data here was obtained from HRMS analysis. The date and day/night sampling condition is indicated in the plot (e.g., 0307DAY means daytime filter for the 3<sup>rd</sup> of July).**

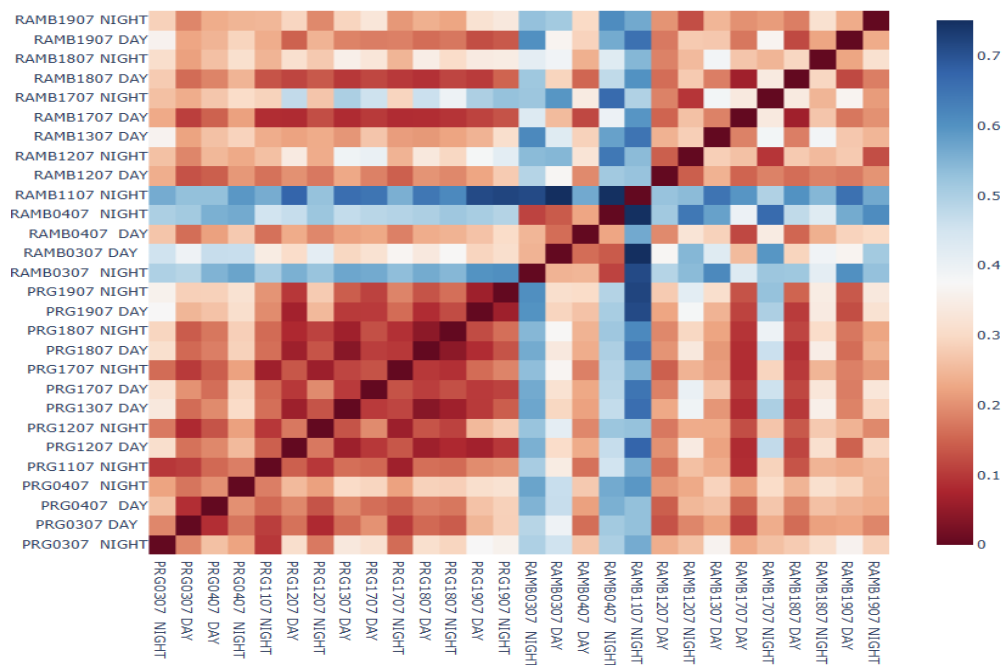

**Figure S4 Cosine distances matrix for samples collecting during day and night at Paris and Rambouillet during the summer 2022. Lower values (red) of cosine distances shows similarities between the samples while higher values (blue) show differences between the samples.**

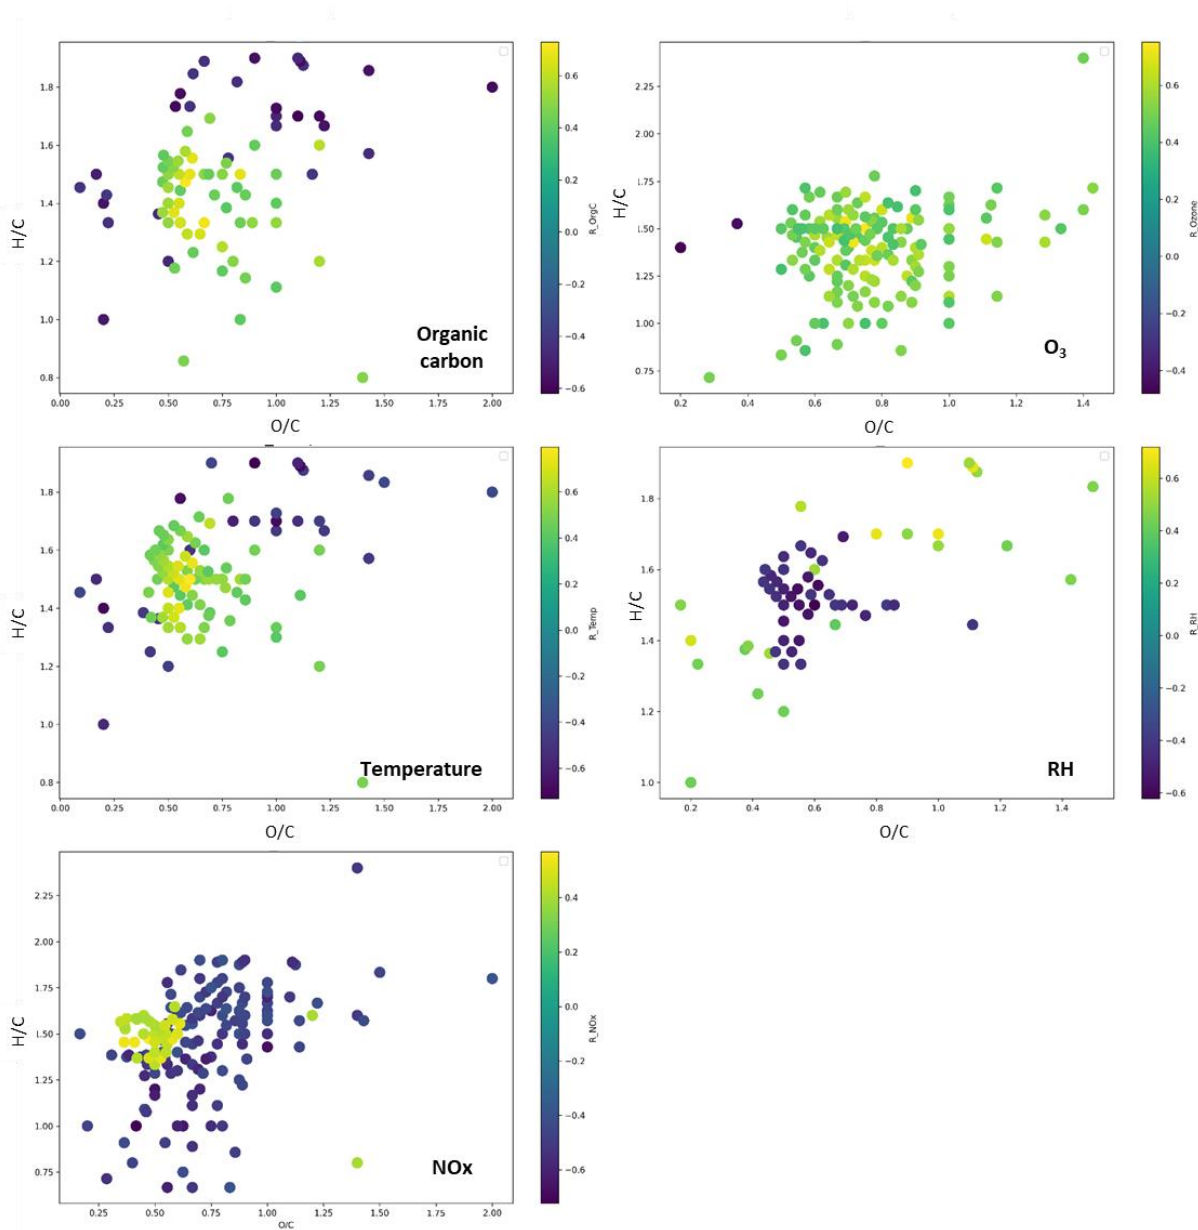

Figure S5: Pearson correlation coefficients for common formulae (577) from different CHO, CHON, CHOS, and CHONS compounds for Paris and Rambouillet samples for  $p$ -value $<0.05$ . Negative correlations are shown in blue and positive in yellow colors.

## References

- 80 Kourtchev, I., Doussin, J.-F., Giorio, C., Mahon, B., Wilson, E. M., Maurin, N., Pangu, E., Venables, D. S., Wenger, J. C., & Kalberer, M. (2015). Molecular composition of fresh and aged secondary organic aerosol from a mixture of biogenic volatile compounds: A high-resolution mass spectrometry study. *Atmospheric Chemistry and Physics*, *15*(10), 5683–5695. <https://doi.org/10.5194/acp-15-5683-2015>
- 85 Kourtchev, I., O'Connor, I. P., Giorio, C., Fuller, S. J., Kristensen, K., Maenhaut, W., Wenger, J. C., Sodeau, J. R., Glasius, M., & Kalberer, M. (2014). Effects of anthropogenic emissions on the molecular composition of urban organic aerosols: An ultrahigh resolution mass spectrometry study. *Atmospheric Environment*, *89*, 525–532. <https://doi.org/10.1016/j.atmosenv.2014.02.051>
- Kristensen, K., Enggrob, K. L., King, S. M., Worton, D. R., Platt, S. M., Mortensen, R., Rosenoern, T., Surratt, J. D., Bilde, M., Goldstein, A. H., & Glasius, M. (2013). Formation and occurrence of dimer esters of pinene oxidation products in atmospheric aerosols. *Atmospheric Chemistry and Physics*, *13*(7), 3763–3776. <https://doi.org/10.5194/acp-13-3763-2013>
- 90 Rincón, A. G., Calvo, A. I., Dietzel, M., & Kalberer, M. (2012). Seasonal differences of urban organic aerosol composition – an ultra-high resolution mass spectrometry study. *Environmental Chemistry*, *9*(3), 298. <https://doi.org/10.1071/EN12016>
- Simoneit, B. R. T. (1985). Application of Molecular Marker Analysis to Vehicular Exhaust for Source Reconciliations. *International Journal of Environmental Analytical Chemistry*, *22*(3–4), 203–232. <https://doi.org/10.1080/03067318508076422>
- 95 Wozniak, A. S., Bauer, J. E., Sleighter, R. L., Dickhut, R. M., & Hatcher, P. G. (2008). Technical Note: Molecular characterization of aerosol-derived water soluble organic carbon using ultrahigh resolution electrospray ionization Fourier transform ion cyclotron resonance mass spectrometry. *Atmospheric Chemistry and Physics*, *8*(17), 5099–5111. <https://doi.org/10.5194/acp-8-5099-2008>
